# Supplementary material
Source: HighWire-hosted journal article supplement (https://jitc.bmj.com/content/13/1/e008979)
Supplement: inline-supplementary-material-1 [file inline-supplementary-material-1.pdf]

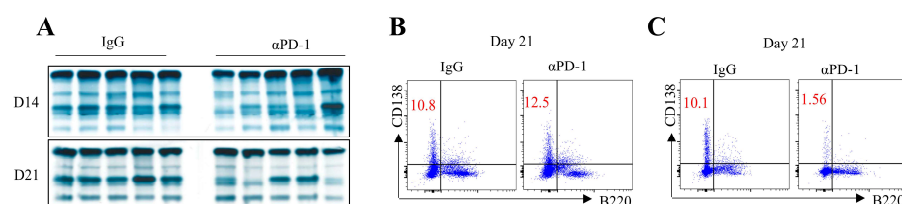

### Supplementary Figure 1. Vk\*MYC and 5TGM1 MM models exhibit different responses to PD-1 ICB

(A-B) C57BL/6 mice were inoculated with  $0.5 \times 10^6$  Vk\*MYC cells intravenously. After 14 days, mice randomly received intraperitoneal injections of 100  $\mu$ g control IgG or  $\alpha$ PD-1 every 3 days, for a total of three injections. Tumor burden was detected by measuring the level of IgG M-protein secreted by MM cells using serum protein electrophoresis (A), or representative histograms showing the percentages of CD138<sup>+</sup> B220<sup>-</sup> plasma cells in the BM (B). (C) C57BL/KaLwRij mice were inoculated intravenously with  $2 \times 10^6$  5TGM1-luc cells and, on day 14, randomly received intraperitoneal injections of 100  $\mu$ g control IgG or  $\alpha$ PD-1 every 3 days for a total of three injections. Representative histograms showing the percentages of CD138<sup>+</sup> B220<sup>-</sup> plasma cells in the BM.

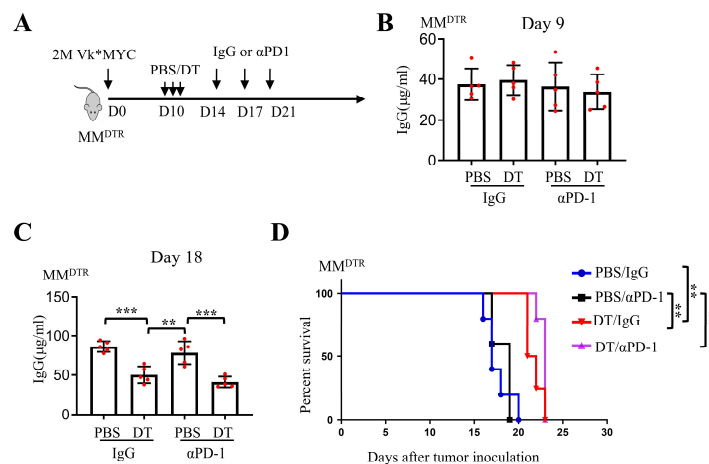

**Supplementary Figure 2. Depleting macrophages inhibits tumor growth without affecting the response to PD-1 inhibitors in Vk\*MYC MM.** (A) MM<sup>DTR</sup> mice were inoculated intravenously with  $2 \times 10^6$  Vk\*MYC cells and randomly received intraperitoneal injections of PBS or DT on day 10, followed by the treatment with IgG or αPD-1 ( $n = 5$ ). Serum IgG levels were measured by ELISA on day 9 (B) and day 18 (C) after tumor inoculation. (D) Kaplan–Meyer survival plots of treated mice. Data are presented as mean  $\pm$  SD. \*\*P < 0.01; \*\*\*P < 0.001.

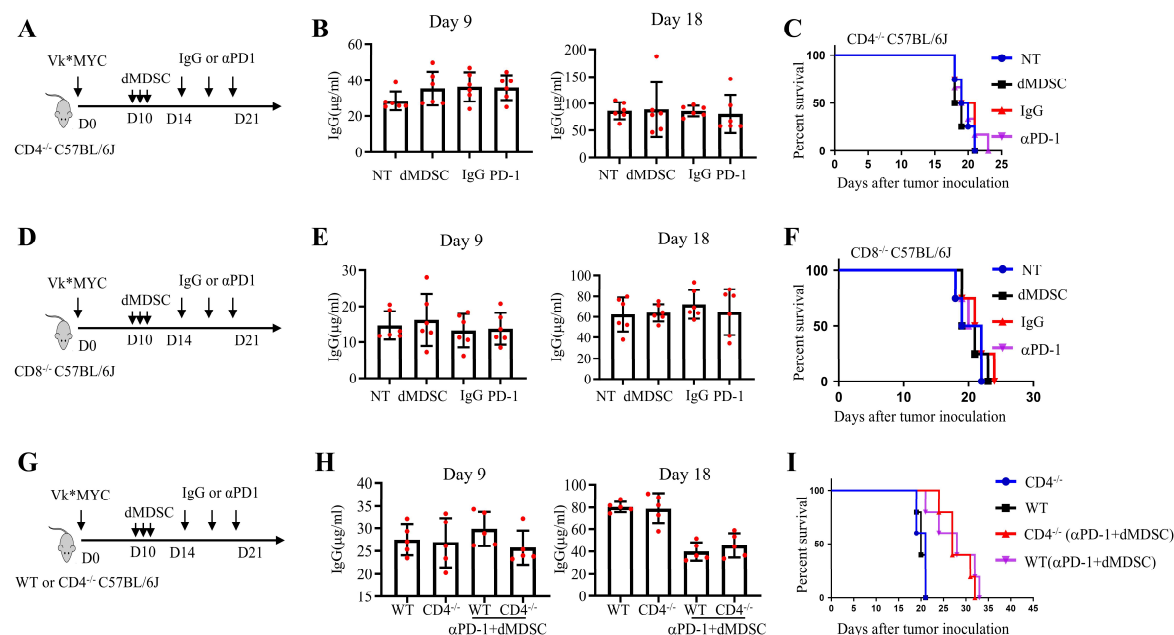

**Supplementary Figure 3. CD4<sup>+</sup> T cells are dispensable for the restored PD-1 inhibitor response induced by MDSC depletion in Vk\*MYC MM.**

(A-C) WT, CD4<sup>-/-</sup> C57BL/6J mice were inoculated intravenously with  $0.5 \times 10^6$  Vk\*MYC cells and randomly received intraperitoneal injections of irrelevant peptides, peptibodies, IgG or αPD-1 on day 10. Serum IgG/M-protein levels were measured by ELISA on day 9 and day 18 after tumor inoculation (B, n = 6), and Kaplan–Meyer survival plots of treated mice (C, n = 6). (D-F) Wild-type, CD8<sup>-/-</sup> C57BL/6J mice were inoculated intravenously with  $0.5 \times 10^6$  Vk\*MYC cells and randomly received intraperitoneal injections of irrelevant peptides, peptibodies, IgG or αPD-1 on day 10. Serum IgG/M-protein levels were measured by ELISA on day 9 and day 18 after tumor inoculation (E, n = 6), and Kaplan–Meyer survival plots of treated mice (F, n = 6). (G-I) Wild-type or CD4<sup>-/-</sup> C57BL/6J mice were inoculated intravenously with  $0.5 \times 10^6$  Vk\*MYC cells and randomly received intraperitoneal injections of irrelevant peptides or peptibodies on day 10, followed by the treatment with IgG or αPD-1. Serum IgG/M-protein levels were measured by ELISA on day 9 and day 18 after tumor inoculation (H, n = 5), and Kaplan–Meyer survival plots of treated mice (I, n = 5).
